# Supplementary material
Source: PubMed Central journal article supplement (PMC4607262)
Supplement: NIHMS729142-supplement-Tables_1-3.pdf [file NIHMS729142-supplement-Tables_1-3.pdf]

**Supplemental Table 1: Population proportions of sodium consumed,<sup>1</sup> by selected food categories among US infants aged 0-5.9 months — What We Eat in America (WWEIA), National Health and Nutrition Examination Survey, United States, 2003–2006 and 2007-2010**

| Rank | NHANES 2003-2006                    |                        | NHANES 2007-2010                    |                        |
|------|-------------------------------------|------------------------|-------------------------------------|------------------------|
|      | Food category                       | % (SE)                 | Food category                       | % (SE)                 |
| 1    | Formula <sup>2</sup>                | 70.4 (3.7)             | Formula <sup>2</sup>                | 72.8 (2.7)             |
| 2    | Human milk                          | 24.6 (3.6)             | Human milk                          | 21.4 (2.4)             |
| 3    | Commercial baby foods <sup>3</sup>  | 2.5 (0.4)              | Commercial baby foods <sup>3</sup>  | 1.9 (0.3)              |
| 4    | Fluid replacement/electrolyte       | 0.5 (0.2) <sup>4</sup> | Fluid replacement/electrolyte       | 1.8 (1.2) <sup>4</sup> |
|      | Mean daily sodium (SE) mg           | 191 (5)**              | Mean daily sodium (SE) mg           | 551 (49)**             |
|      | Mean daily energy (SE) Kcal         | 658 (10)**             | Mean daily energy (SE) Kcal         | 887 (21)**             |
|      | Mean sodium density (mg/1,000 Kcal) | 288 (7)**              | Mean sodium density (mg/1,000 Kcal) | 314 (7)**              |
|      | Unweighted sample size              | 406                    | Unweighted sample size              | 486                    |

Abbreviation: SE: standard error

<sup>1</sup>The population proportion (%) of sodium consumed is defined as the sum of the amount of sodium consumed from each specific food category for all participants in the age group divided by the sum of sodium consumed from all food categories for all participants in the age group multiplied by 100. Standard errors of the estimates are in parentheses.

<sup>2</sup> Formula includes formula prepared from concentrate, prepared from powder, and ready-to-eat

<sup>3</sup> Commercial baby foods include cereal, fruits and vegetables, meat and dinners, snacks and desserts, yogurt and juice

<sup>4</sup> Data are statistically unreliable; relative standard error  $\geq 40\%$

\*\* Mean daily energy intake was statistically significant between NHANES 2003-2006 and 2007-2010 ( $p=0.0015$  using T-test)

Mean daily sodium density was statistically significant between NHANES 2003-2006 and 2007-2010 ( $p=0.007$  using T-test)

The top contributors and the population proportions of sodium consumed by top 10 food categories did not differ significantly between 2003-2006 and 2007-2010 ( $p=0.3-0.6$  using T-test)

**Supplemental Table 2: Population proportions of sodium consumed,<sup>1</sup> by selected food categories among US infants aged 6-11.9 months — What We Eat in America (WWEIA), National Health and Nutrition Examination Survey, United States, 2003–2006 and 2007-2010**

| Rank | NHANES 2003-2006                    |                        | NHANES 2007-2010                    |                        |
|------|-------------------------------------|------------------------|-------------------------------------|------------------------|
|      | Food category                       | % (SE)                 | Food category                       | % (SE)                 |
| 1    | Formula <sup>2</sup>                | 24.5 (2.7)             | Formula <sup>2</sup>                | 29.0 (2.2)             |
| 2    | Commercial baby foods <sup>3</sup>  | 9.5 (1.3)              | Commercial baby foods <sup>3</sup>  | 8.0 (0.9)              |
| 3    | Soups                               | 6.2 (1.2)              | Soups                               | 6.0 (1.2)              |
| 4    | Frankfurters and sausages           | 5.2 (3.3) <sup>4</sup> | Pasta mixed dishes <sup>5</sup>     | 4.7 (1.5) <sup>4</sup> |
| 5    | Macaroni and cheese                 | 4.8 (1.0)              | Milk <sup>6</sup>                   | 4.4 (0.9)              |
| 6    | Human milk                          | 4.0 (0.6)              | Human milk                          | 3.7 (0.7)              |
| 7    | Pasta mixed dishes <sup>5</sup>     | 3.3 (0.9)              | Cheese <sup>7</sup>                 | 2.7 (0.9) <sup>4</sup> |
| 8    | Breads and rolls <sup>8</sup>       | 2.9 (0.6)              | Eggs and omelets                    | 2.6 (0.7)              |
| 9    | Crackers <sup>9</sup>               | 2.9 (0.5)              | Meat mixed dishes                   | 2.4 (1.1) <sup>4</sup> |
| 10   | Beans, peas, legumes <sup>10</sup>  | 2.9 (2.0) <sup>4</sup> | Breads and rolls <sup>8</sup>       | 2.4 (0.6)              |
|      | Mean daily sodium (SE) mg           | 551 (49)               | Mean daily sodium (SE) mg           | 487 (27)               |
|      | Mean daily energy (SE) Kcal         | 887 (21)               | Mean daily energy (SE) Kcal         | 837 (16)               |
|      | Mean sodium density (mg/1,000 Kcal) | 560 (28)               | Mean sodium density (mg/1,000 Kcal) | 545 (25)               |
|      | Unweighted sample size              | 486                    | Unweighted sample size              | 428                    |

Abbreviation: SE: standard error

<sup>1</sup> The population proportion (%) of sodium consumed is defined as the sum of the amount of sodium consumed from each specific food category for all participants in the age group divided by the sum of sodium consumed from all food categories for all participants in the age group multiplied by 100. Standard errors (SE) of the estimates are in parentheses.

<sup>2</sup> Formula includes formula prepared from concentrate, prepared from powder, and ready-to-eat

<sup>3</sup> Commercial baby foods include cereal, fruits and vegetables, meat and dinners, snacks and desserts, yogurt and juice

<sup>4</sup>Data are statistically unreliable; relative standard error  $\geq$  30%.

<sup>5</sup> Pasta mixed dishes category does not include macaroni and cheese, which is its own category

<sup>6</sup> Milk includes unflavored low fat, nonfat, reduced fat and whole milk <sup>7</sup>Natural and processed cheese <sup>8</sup>Yeast breads, rolls and buns

<sup>9</sup>Crackers include saltines

<sup>10</sup> Includes dry or cooked beans, green/split peas and legumes mixed dishes (e.g. refried beans, hummus, chili with beans)

Mean sodium and energy intake and mean sodium density did not differ significantly between 2003-2006 and 2007-2010 ( $p=0.06-0.6$ ). Some of the top contributors differed (e.g. macaroni and cheese ( $p=0.001$ ) and crackers ( $p=0.11$ ) in 2003-2006 and milk ( $p=0.14$ ) and cheese ( $p=0.16$ ) in 2007-2010) but the population proportions of sodium consumed by top 10 food categories did not differ significantly between 2003-2006 and 2007-2010 ( $p=0.001-0.9$  using T-test)

**Supplemental Table 3: Population proportions of sodium consumed,<sup>1</sup> by selected food categories among US toddlers aged 12-23.9 months — What We Eat in America (WWEIA), National Health and Nutrition Examination Survey, United States, 2003–2006 and 2007-2010**

| Rank | NHANES 2003-2006                    |            | NHANES 2007-2010                    |            |
|------|-------------------------------------|------------|-------------------------------------|------------|
|      | Food category                       | % (SE)     | Food category                       | % (SE)     |
| 1    | Milk <sup>2</sup>                   | 11.2 (0.6) | Milk <sup>2</sup>                   | 13.5 (0.6) |
| 2    | Soups                               | 5.8 (1.7)  | Pasta mixed dishes <sup>3</sup>     | 5.4 (0.6)  |
| 3    | Cheese <sup>4</sup>                 | 5.5 (0.5)  | Soups                               | 4.9 (0.6)  |
| 4    | Breads and rolls <sup>5</sup>       | 5.0 (0.5)  | Cheese <sup>4</sup>                 | 4.9 (0.8)  |
| 5    | Pasta mixed dishes <sup>3</sup>     | 4.8 (0.6)  | Frankfurters and sausages           | 4.8 (1.0)  |
| 6    | Frankfurters and sausages           | 4.4 (0.6)  | Chicken patties, nuggets/tenders    | 4.4 (0.8)  |
| 7    | Eggs and omelets                    | 4.3 (0.7)  | Breads and rolls <sup>5</sup>       | 3.9 (0.4)  |
| 8    | Macaroni and cheese                 | 3.5 (0.7)  | Macaroni and cheese                 | 3.7 (0.7)  |
| 9    | Crackers <sup>6</sup>               | 3.2 (0.3)  | Eggs and omelets                    | 3.5 (0.6)  |
| 10   | Ready-to-eat cereals <sup>7</sup>   | 3.1 (0.3)  | Crackers <sup>6</sup>               | 3.1 (0.2)  |
|      | Mean daily sodium (SE) mg           | 1768 (49)  | Mean daily sodium (SE) mg           | 1645 (54)  |
|      | Mean daily energy (SE) Kcal         | 1309 (30)  | Mean daily energy (SE) Kcal         | 1224 (32)  |
|      | Mean sodium density (mg/1,000 Kcal) | 1354 (36)  | Mean sodium density (mg/1,000 Kcal) | 1328 (19)  |
|      | Unweighted sample size              | 628        | Unweighted sample size              | 591        |

Abbreviation: SE: standard error

<sup>1</sup> The population proportion (%) of sodium consumed is defined as the sum of the amount of sodium consumed from each specific food category for all participants in the age group divided by the sum of sodium consumed from all food categories for all participants in the age group multiplied by 100. Standard errors of the estimates are in parentheses.

<sup>2</sup> Milk includes unflavored low fat, nonfat, reduced fat and whole milk

<sup>3</sup>Pasta mixed dishes category does not include macaroni and cheese, which is its own category

<sup>4</sup>Natural and processed cheese <sup>5</sup>Yeast breads, rolls and buns <sup>6</sup> Crackers include saltines

<sup>7</sup> Ready-to-eat cereals include lower sugar ( $\leq 21.2\text{g}/100\text{g}$ ) and higher sugar ( $>21.2\text{g}/100\text{g}$ )

Mean sodium and energy intake and mean sodium density did not differ significantly between 2003-2006 and 2007-2010 ( $p=0.06-0.5$  using T-test). Some of the top contributors differed (e.g. ready-to-eat cereals in 2003-2006 and chicken patties, nuggets/tenders in 2007-2010) but the population proportions of sodium consumed by top 10 food categories did not differ significantly between 2003-2006 and 2007-2010 ( $p=0.06-0.83$  using T-test).
